# Supplementary material
Source: ML conference proceedings conference paper supplement (https://openaccess.thecvf.com/content/CVPR2023/html/Wang_A_Practical_Stereo_CVPR_2023_paper.html)
Supplement: Supplementary file 1 [file supp.pdf › supp.pdf]

# Supplement: A Practical Stereo Depth System for Smart Glasses

Jialiang Wang<sup>1\*</sup> Daniel Scharstein<sup>1</sup> Akash Bapat<sup>1</sup> Kevin Blackburn-Matzen<sup>2†</sup>  
 Matthew Yu<sup>1</sup> Jonathan Lehman<sup>1</sup> Suhib Alsisan<sup>1</sup> Yanghan Wang<sup>1</sup> Sam Tsai<sup>1</sup>  
 Jan-Michael Frahm<sup>1</sup> Zijian He<sup>1</sup> Peter Vajda<sup>1</sup> Michael F. Cohen<sup>1</sup> Matt Uyttendaele<sup>1</sup>

<sup>1</sup>Meta Platforms Inc. <sup>2</sup>Adobe

## 0.1. Derivation of projection model

Below is an expanded version of Section 4.1 with the full derivation of the projection model.

A 3D point  $P = (X, Y, Z)$  projects to pixel coordinates  $(u_0, v_0)$ ,  $(u_1, v_1)$  in the two images. Assuming that radial distortion has been corrected for and that intrinsics (focal lengths  $f_i$  and principal points  $c_{x_i}, c_{y_i}$ ) are known, we convert to normalized image coordinates  $x_i = (u_i - c_{x_i})/f_i$ ,  $y_i = (v_i - c_{y_i})/f_i$ .

Under the above assumptions the cameras are located at  $\mathbf{t}_0 = [0 \ 0 \ 0]^T$  and  $\mathbf{t}_1 = [1 \ 0 \ 0]^T$ , and their rotations are  $\mathbf{R}_0 = \mathbf{R}(\boldsymbol{\omega}_0)$  and  $\mathbf{R}_1 = \mathbf{R}(\boldsymbol{\omega}_1)$ . We use a linear approximation for the rotations since we expect the rotational corrections to be small:

$$\mathbf{R}(\boldsymbol{\omega}) \approx \mathbf{I} + [\boldsymbol{\omega}]_{\times} = \begin{bmatrix} 1 & -\omega_z & \omega_y \\ \omega_z & 1 & -\omega_x \\ -\omega_y & \omega_x & 1 \end{bmatrix}. \quad (1)$$

In normalized image coordinates, point  $P$  projects into the left camera at

$$\begin{bmatrix} x_0 \\ y_0 \\ 1 \end{bmatrix} \sim \begin{bmatrix} \mathbf{I} + [\boldsymbol{\omega}_0]_{\times} \end{bmatrix} \begin{bmatrix} X \\ Y \\ Z \end{bmatrix}. \quad (2)$$

Parametrizing by inverse depth (*disparity*)  $d = 1/Z$  we can “unproject” the point

$$\begin{bmatrix} X \\ Y \\ Z \\ 1 \end{bmatrix} \sim \begin{bmatrix} X/Z \\ Y/Z \\ 1 \\ 1/Z \end{bmatrix} \sim \begin{bmatrix} \mathbf{I} - [\boldsymbol{\omega}_0]_{\times} & \mathbf{0} \\ \mathbf{0} & 1 \end{bmatrix} \begin{bmatrix} x_0 \\ y_0 \\ 1 \\ d \end{bmatrix}. \quad (3)$$

Projecting it into the right camera, we get

$$\begin{bmatrix} x_1 \\ y_1 \\ 1 \end{bmatrix} \sim \begin{bmatrix} \mathbf{I} + [\boldsymbol{\omega}_1]_{\times} & \mathbf{0} \\ \mathbf{0} & 1 \end{bmatrix} \begin{bmatrix} \mathbf{I} & 1 \\ \mathbf{0} & 0 \\ \mathbf{0} & 1 \end{bmatrix} \begin{bmatrix} \mathbf{I} - [\boldsymbol{\omega}_0]_{\times} & \mathbf{0} \\ \mathbf{0} & 1 \end{bmatrix} \begin{bmatrix} x_0 \\ y_0 \\ 1 \\ d \end{bmatrix} \quad (4)$$

$$\approx \begin{bmatrix} \mathbf{I} + [\boldsymbol{\omega}_1 - \boldsymbol{\omega}_0]_{\times} \end{bmatrix} \begin{bmatrix} x_0 \\ y_0 \\ 1 \end{bmatrix} + \begin{bmatrix} \mathbf{I} + [\boldsymbol{\omega}_1]_{\times} \end{bmatrix} \begin{bmatrix} d \\ 0 \\ 0 \end{bmatrix} \quad (5)$$

$$= \begin{bmatrix} \mathbf{I} + [\Delta\boldsymbol{\omega}]_{\times} \end{bmatrix} \begin{bmatrix} x_0 \\ y_0 \\ 1 \end{bmatrix} + d \begin{bmatrix} 1 \\ -\omega_{z1} \\ \omega_{y1} \end{bmatrix}, \quad (6)$$

where  $\Delta\boldsymbol{\omega} = \boldsymbol{\omega}_1 - \boldsymbol{\omega}_0$  is the relative orientation of the two cameras. We can see that for  $d = 0$  (i.e., a point at infinity), we can only recover the relative orientation  $\Delta\boldsymbol{\omega}$ . For closer points ( $d < 0$ ) we also get a constraint for absolute roll and absolute pan, but not absolute pitch, as discussed earlier.

If we use  $\Delta x = x_1 - x_0$  as our estimate for  $d$  and also introduce a scale correction  $(1 + \Delta f)$ , we have

$$\begin{bmatrix} x_1 \\ y_1 \\ 1 + \Delta f \end{bmatrix} \sim \begin{bmatrix} 1 & \Delta\omega_z & -\Delta\omega_y \\ -\Delta\omega_z & 1 & \Delta\omega_x \\ \Delta\omega_y & -\Delta\omega_x & 1 \end{bmatrix} \begin{bmatrix} x_0 \\ y_0 \\ 1 \end{bmatrix} + \Delta x \begin{bmatrix} 1 \\ -\omega_{z1} \\ \omega_{y1} \end{bmatrix} \quad (7)$$

$$= \begin{bmatrix} x_0 + \Delta\omega_z y_0 - \Delta\omega_y \Delta x \\ y_0 - \Delta\omega_z x_0 + \Delta\omega_x \Delta x \\ 1 + \Delta\omega_y x_0 - \Delta\omega_x y_0 + \omega_{y1} \Delta x \end{bmatrix}. \quad (8)$$

Cross-multiplying and dropping higher-order terms we get two equations in the 6 unknowns, where  $\Delta y = y_1 - y_0$ :

$$\begin{bmatrix} -y_0 x_1 & 1 + x_0 x_1 & -y_0 & \Delta x x_1 & 0 & -x_1 \\ 1 + y_0 y_1 & -x_0 y_1 & -x_0 & -\Delta x y_1 & -\Delta x & y_0 \end{bmatrix} \begin{bmatrix} \Delta\omega_x \\ \Delta\omega_y \\ \Delta\omega_z \\ \omega_{y1} \\ \omega_{z1} \\ \Delta f \end{bmatrix} = \begin{bmatrix} 0 \\ \Delta y \end{bmatrix}. \quad (9)$$

Of these, only the second equation gives us a constraint relating  $y_0$  and  $y_1$ . We can collect these equations, one for each matched feature point, and solve the over-constrained system using robust least squares.

\*Email: jialiangw@meta.com

†work was done at Meta
