# Supplementary material
Source: ML conference proceedings conference paper supplement (https://openaccess.thecvf.com/content/CVPR2023/html/Wang_A_Practical_Stereo_CVPR_2023_paper.html)
Supplement: Supplementary file 2 [file Wang_A_Practical_Stereo_CVPR_2023_supplemental.zip]

Archive with 8 entries (8 files):
- supp.pdf
- __MACOSX/._supp.pdf
- video1.mp4
- __MACOSX/._video1.mp4
- video2.mp4
- __MACOSX/._video2.mp4
- video3.mp4
- __MACOSX/._video3.mp4
